# Supplementary material for: A theoretical study of the mechanisms of oxidation of ethylene by manganese oxo complexes
Source: Royal Society of Chemistry journal article supplement (doi:10.1039/c3dt51700d), 2013-01-01
Supplement: c3dt51700d.pdf [file c3dt51700d.pdf]

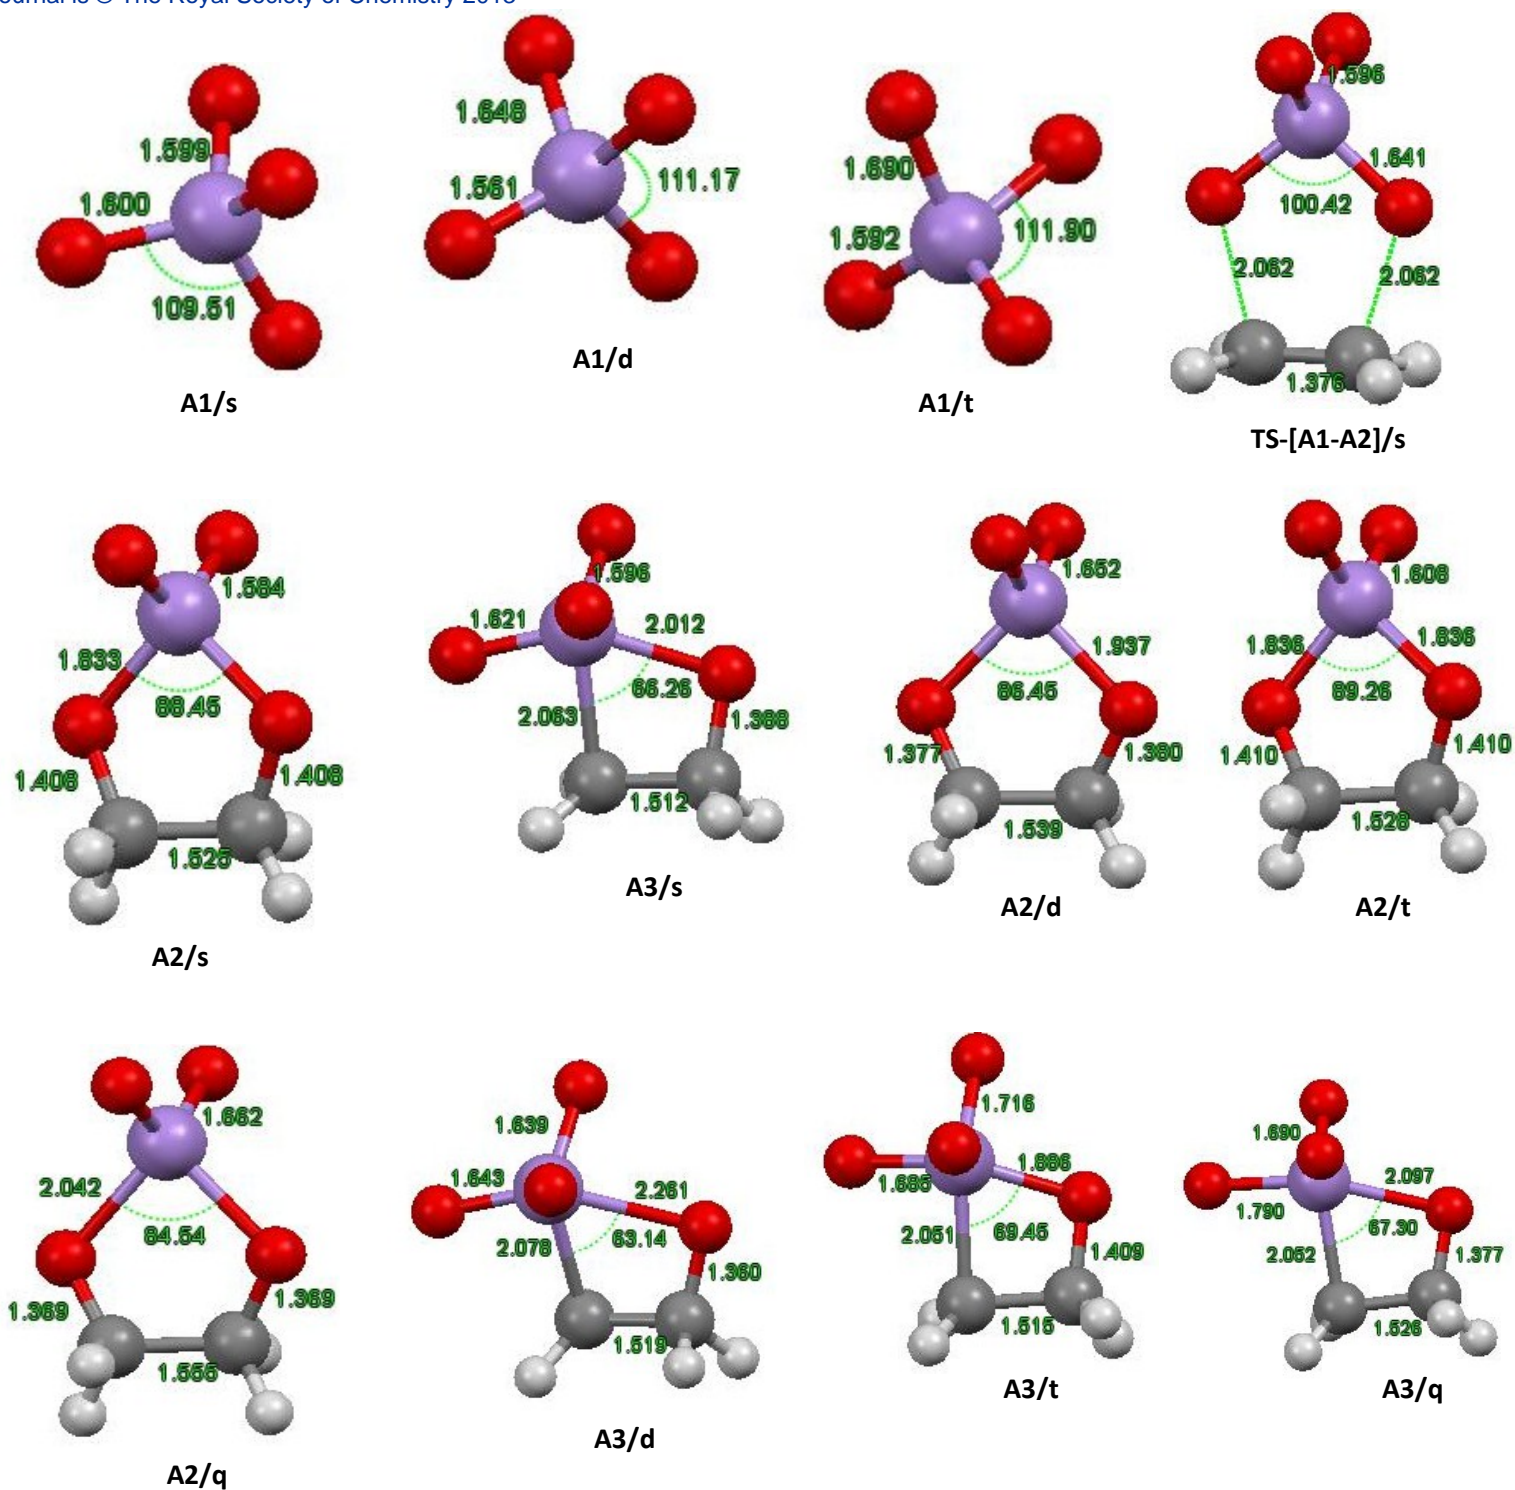

**Fig S1:** Optimized geometrical parameters of the reaction of  $\text{MnO}_4^-$  with Ethylene. Bond distances and angles in Å and degrees.

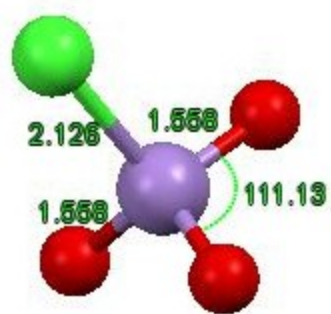

R1-A4/s

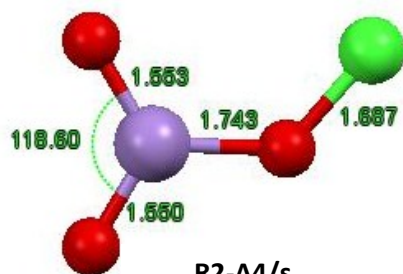

R2-A4/s

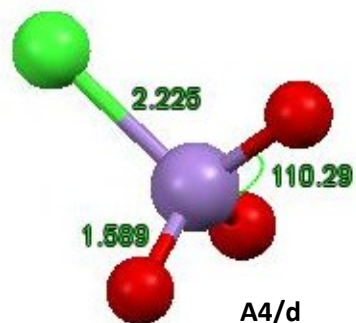

A4/d

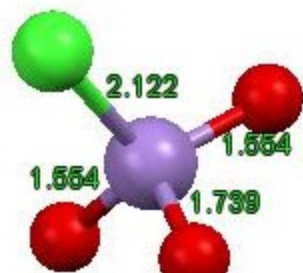

A4/t

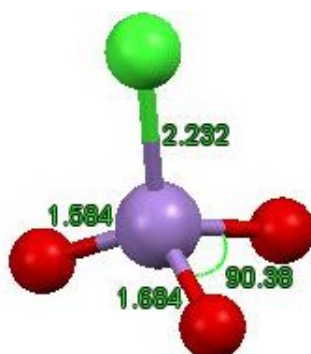

A4/q

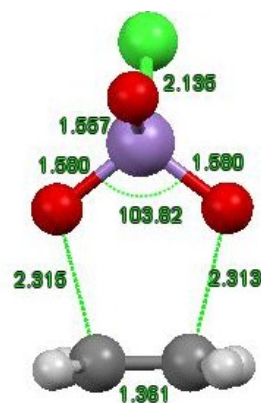

TS-[A4-A5]/s

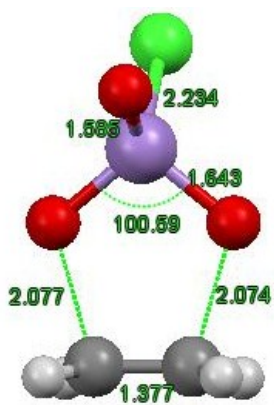

TS-[A4-A5]/d

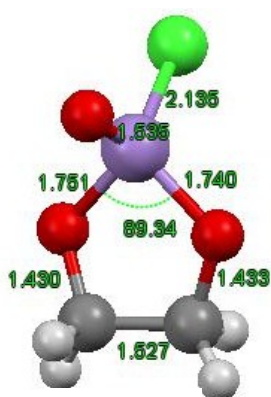

A5/s

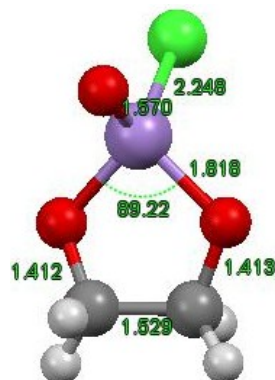

A5/d

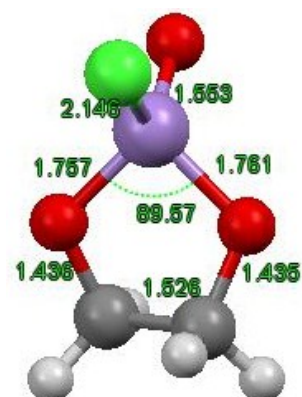

A5/t

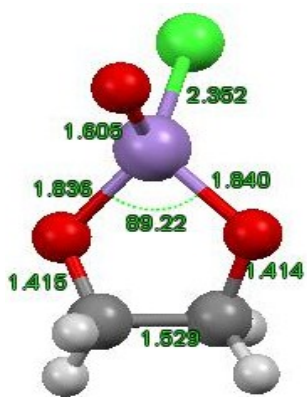

A5/q

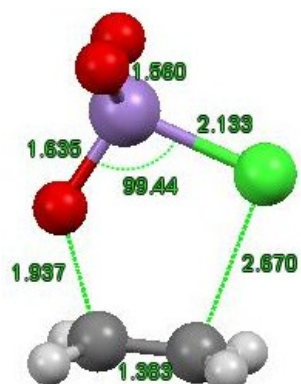

TS-[A4-A6]/s

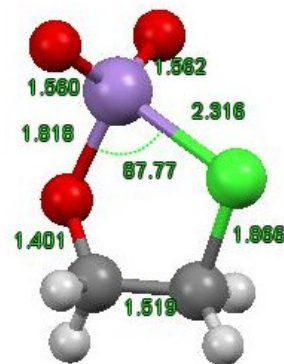

A6/s



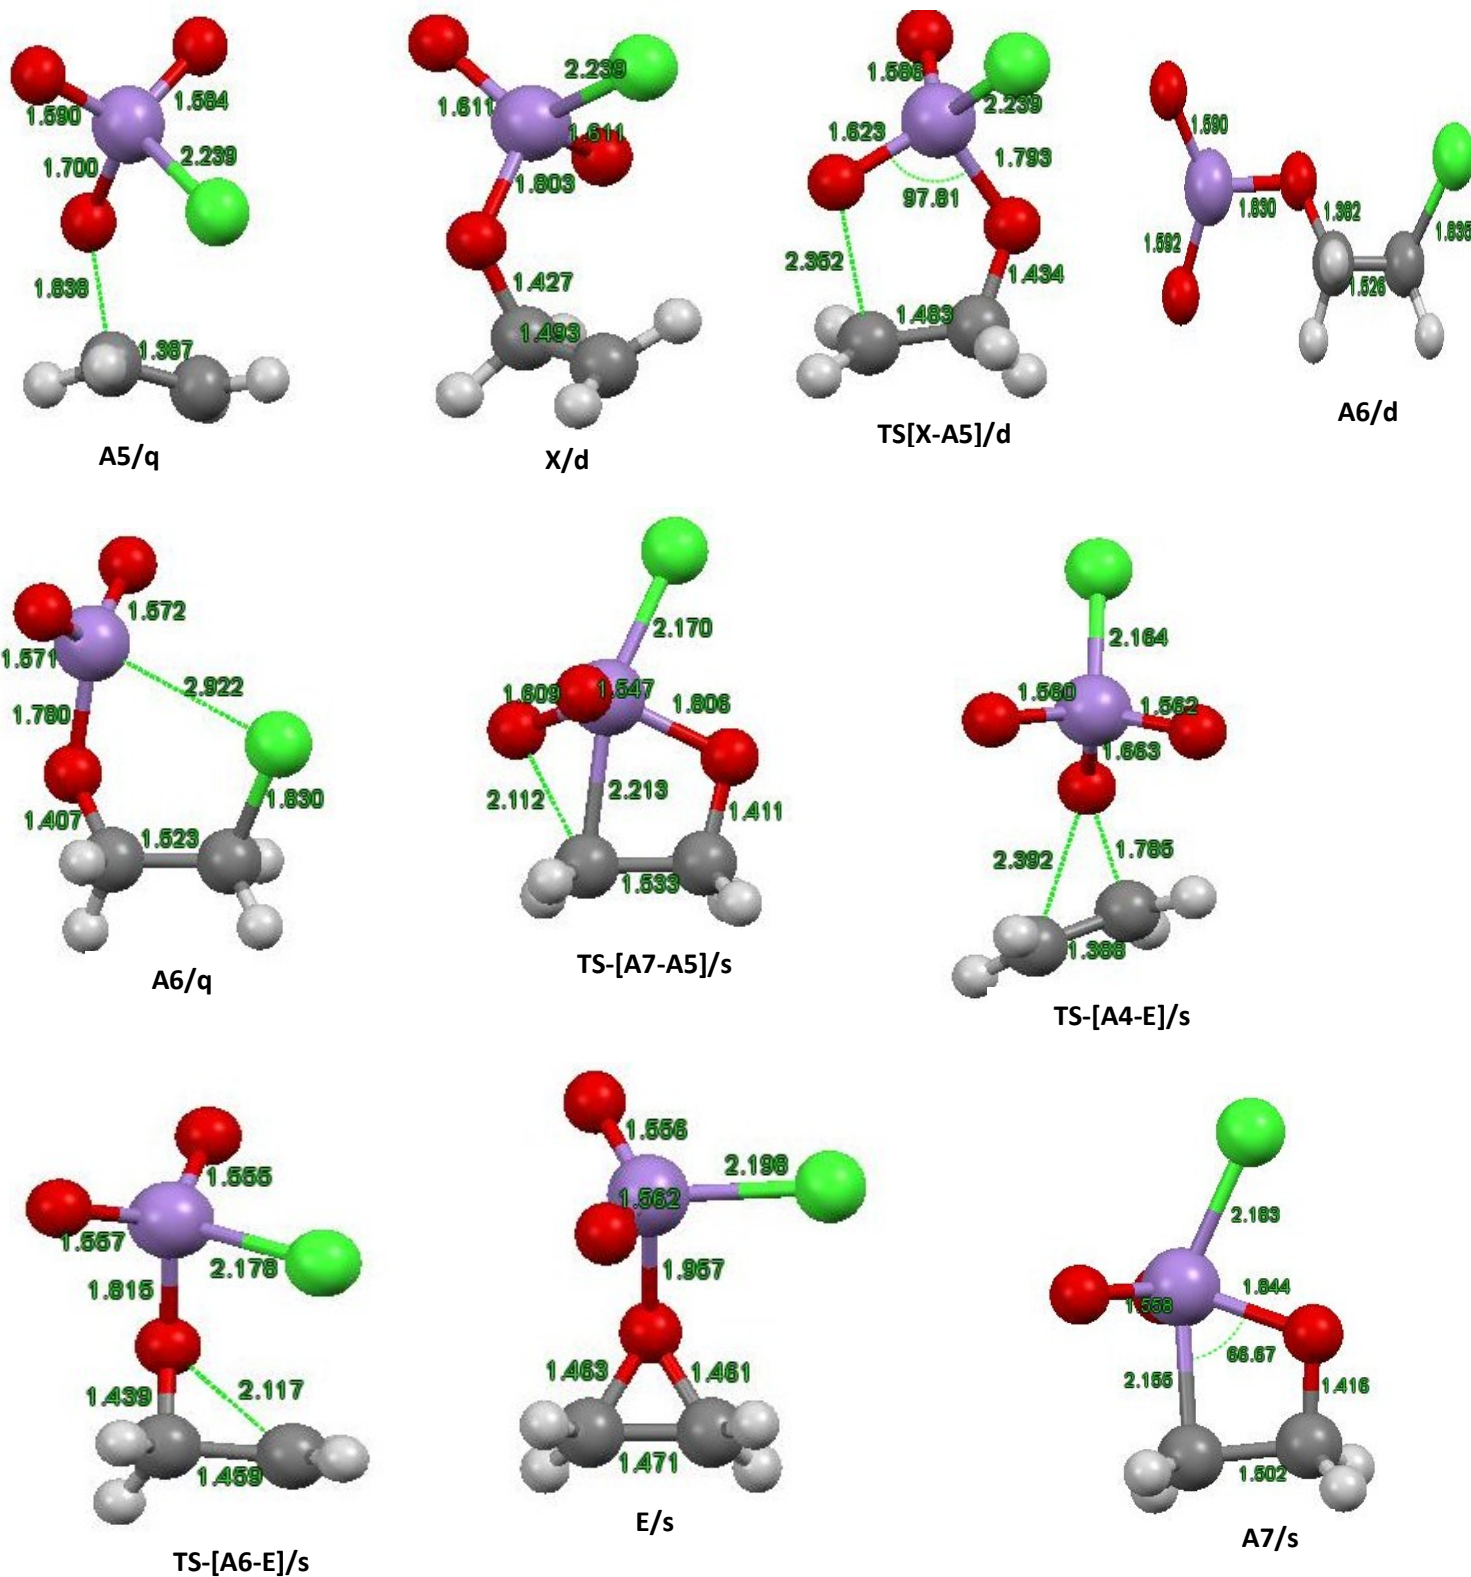

**Fig S2:** Optimized geometrical parameters of the reaction of  $\text{MnO}_3\text{Cl}$  with Ethylene. Bond distances and angles in Å and degrees.

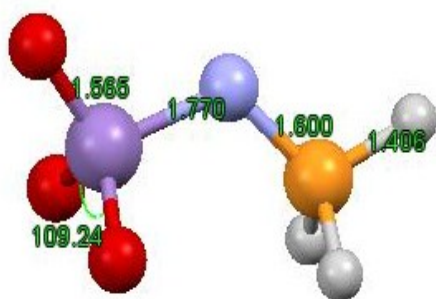

A8/s

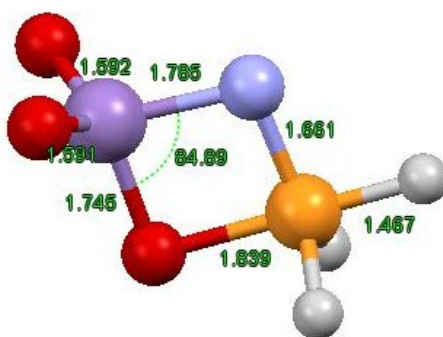

A8/d

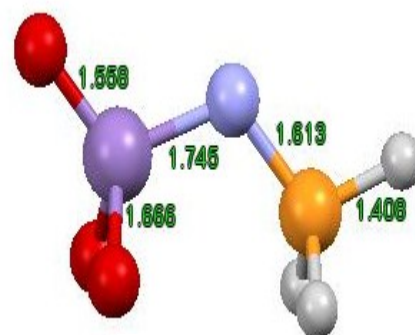

A8/t

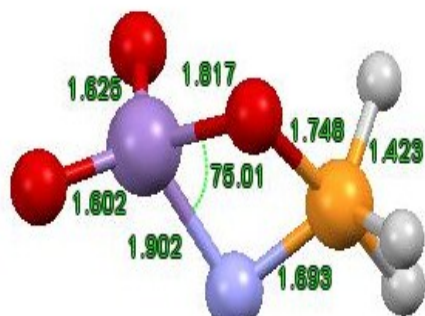

A8/q

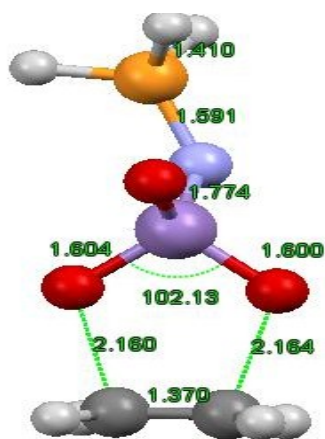

TS-[A8-A9]/s

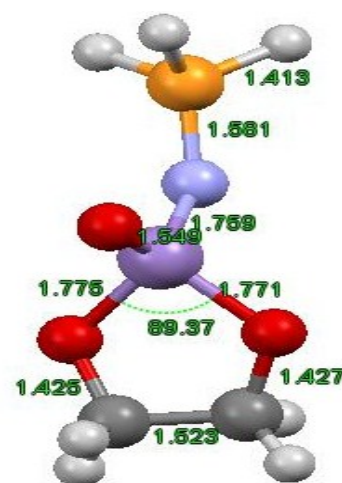

A9/s

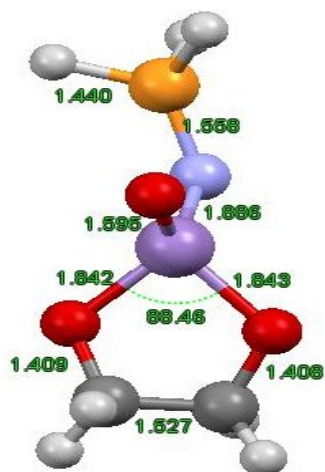

A9/d

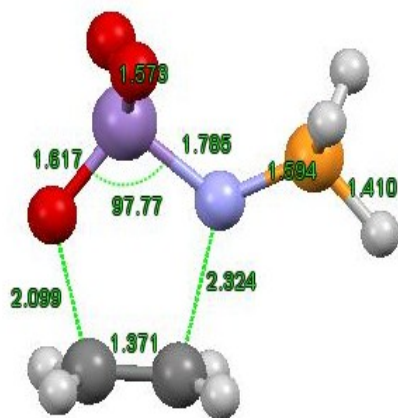

TS-[A8-A10]/s

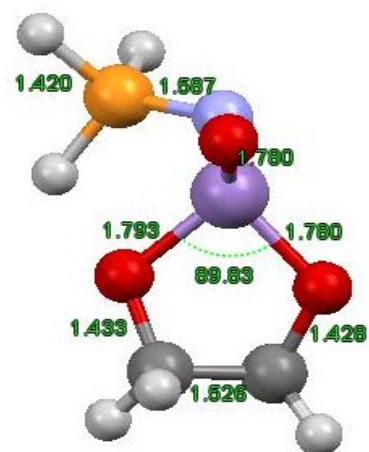

A9/t

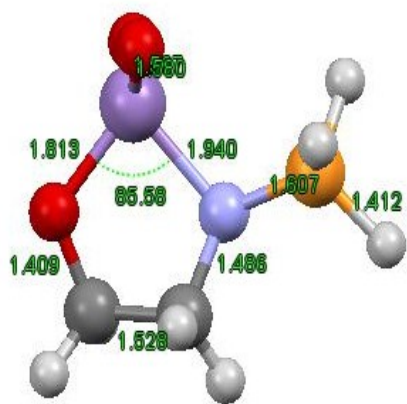

A10/s

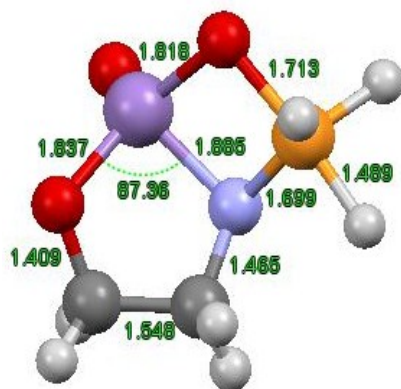

A10/d

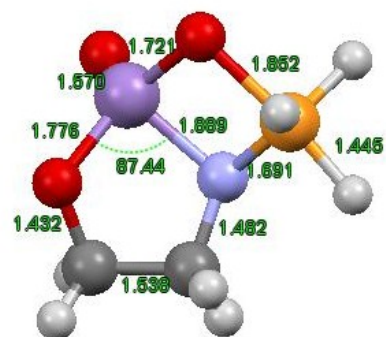

A10/t

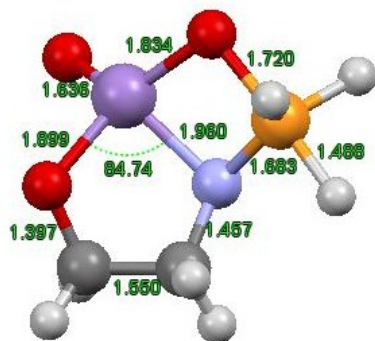

A10/q

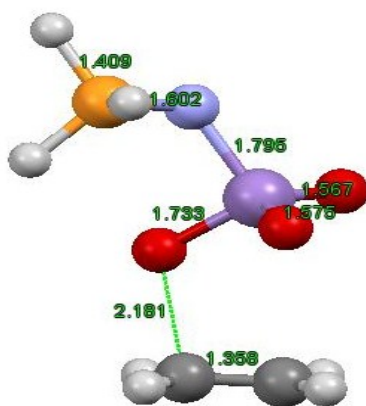

TS-[A8-X]/t

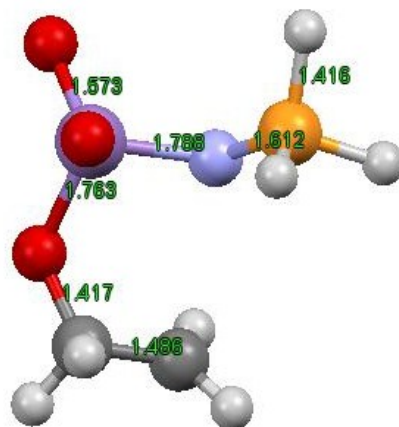

X/t

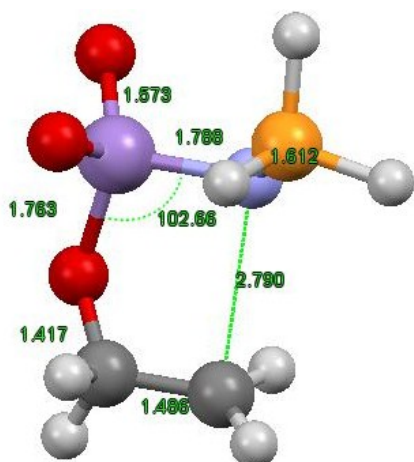

TS-[X-A10]/t

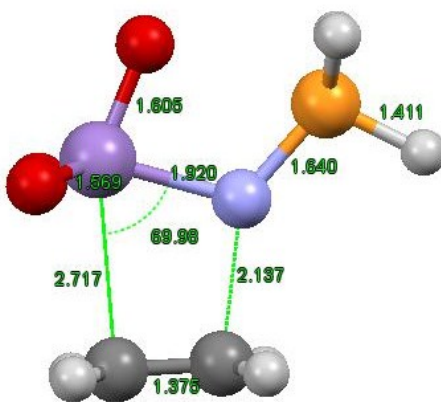

TS-[A8-A11]/s

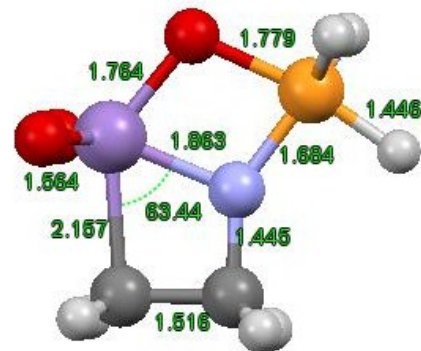

A11/s



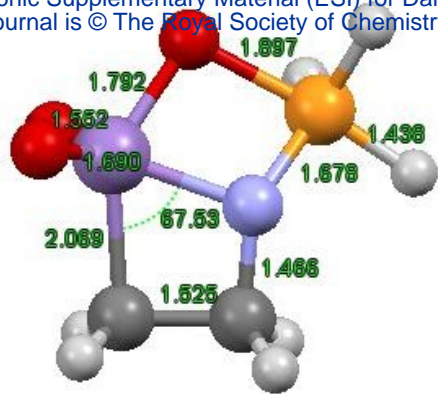

A11/t

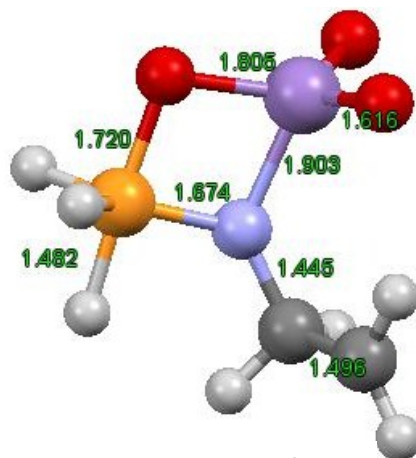

A11/q

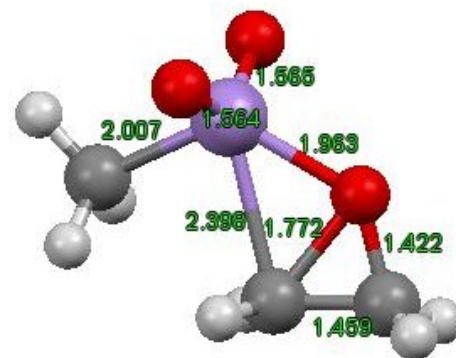

TS-[A12-E]/s

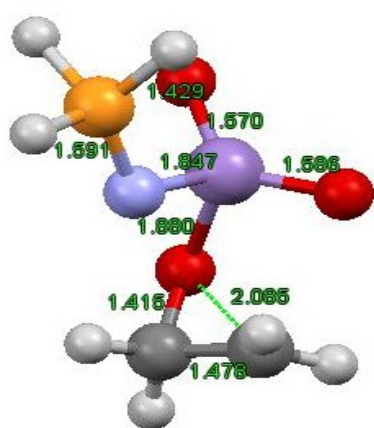

TS-[A9-E]/s

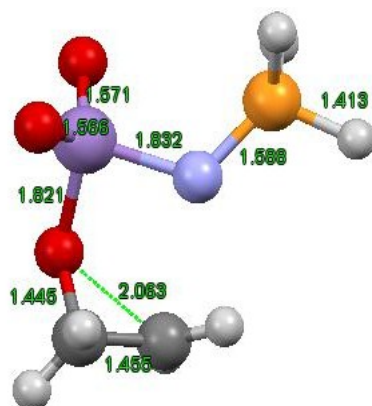

TS-[A10-E]/s

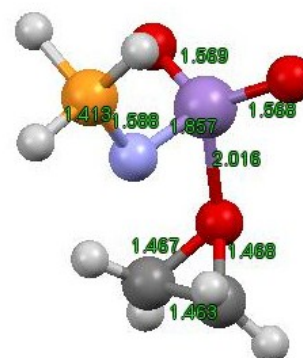

E/s

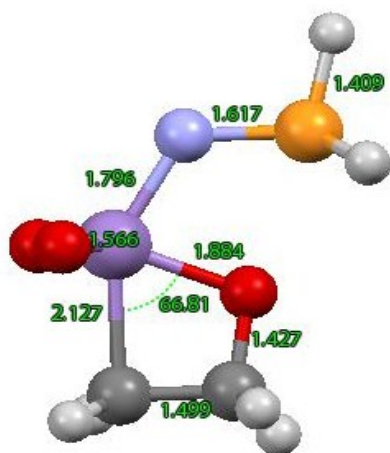

A12/s

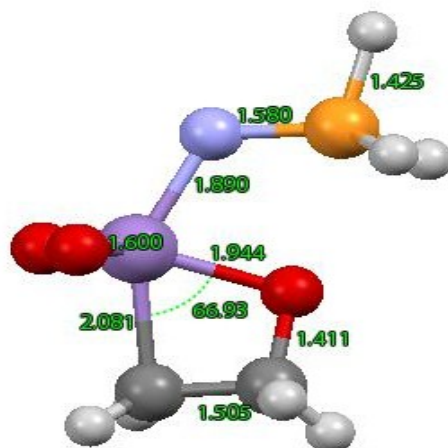

A12/d

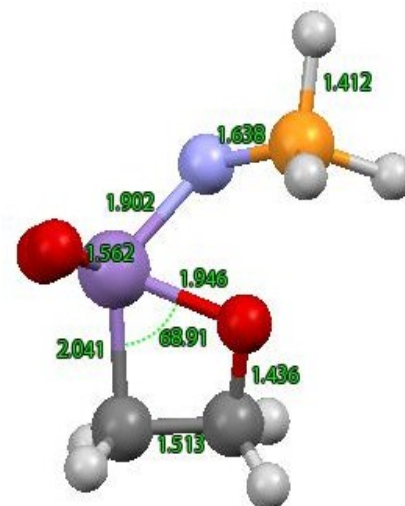

A12/t

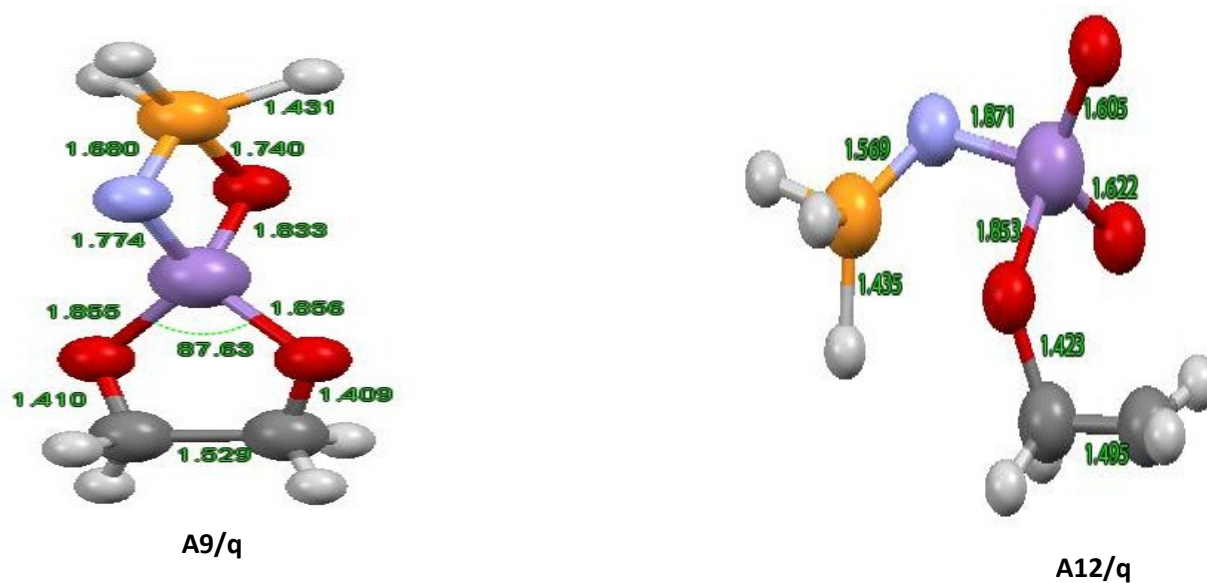

**Fig S3:** Optimized geometrical parameters of the reaction of  $\text{MnO}_3(\text{NPH}_3)$  with Ethylene. Bond distances and angles in Å and degrees.

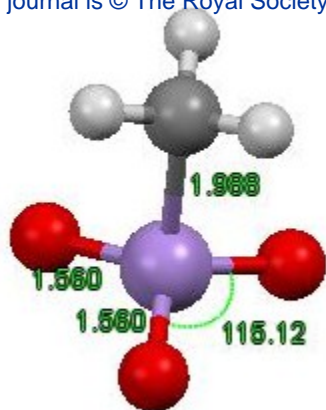

R1- A13/s

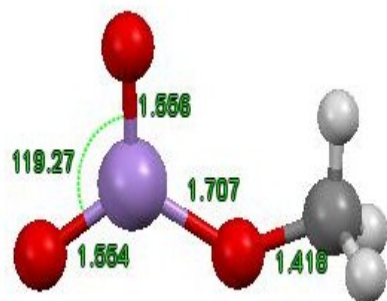

R2- A13/s

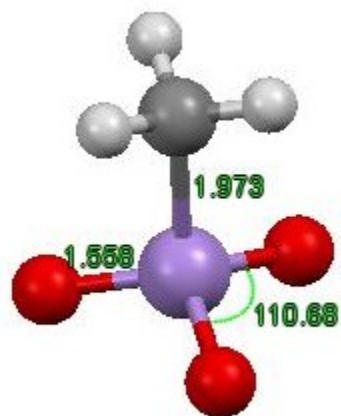

A13/d

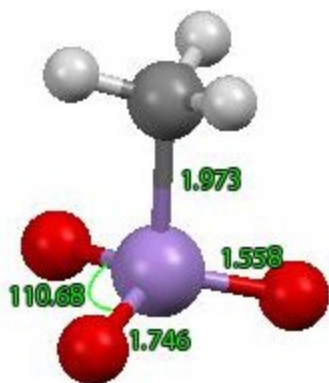

A13/t

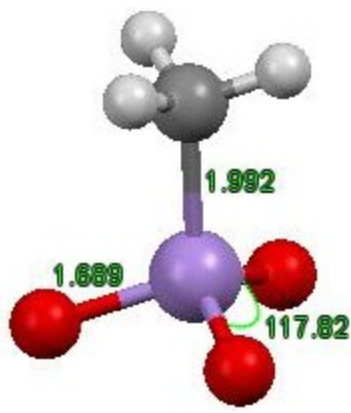

A13/q

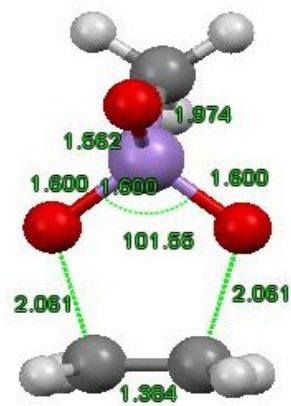

TS-[A13-A14]/s

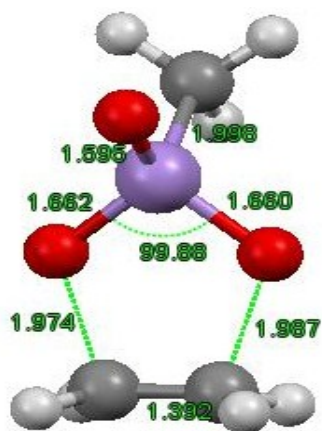

TS-[A13-A14]/d

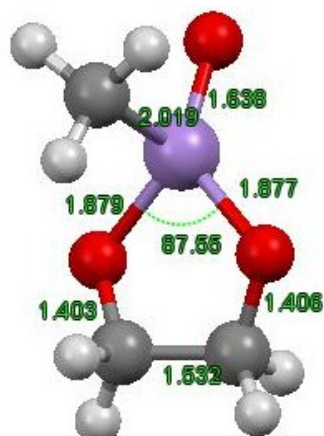

A14/s

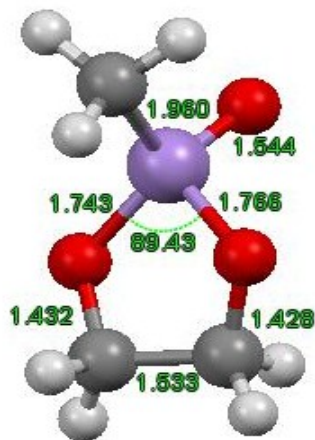

A14/d

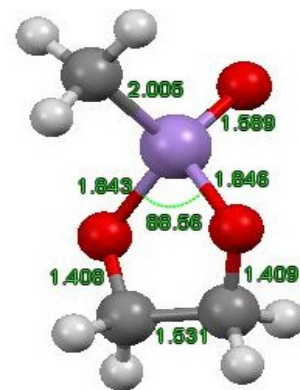

A14/t



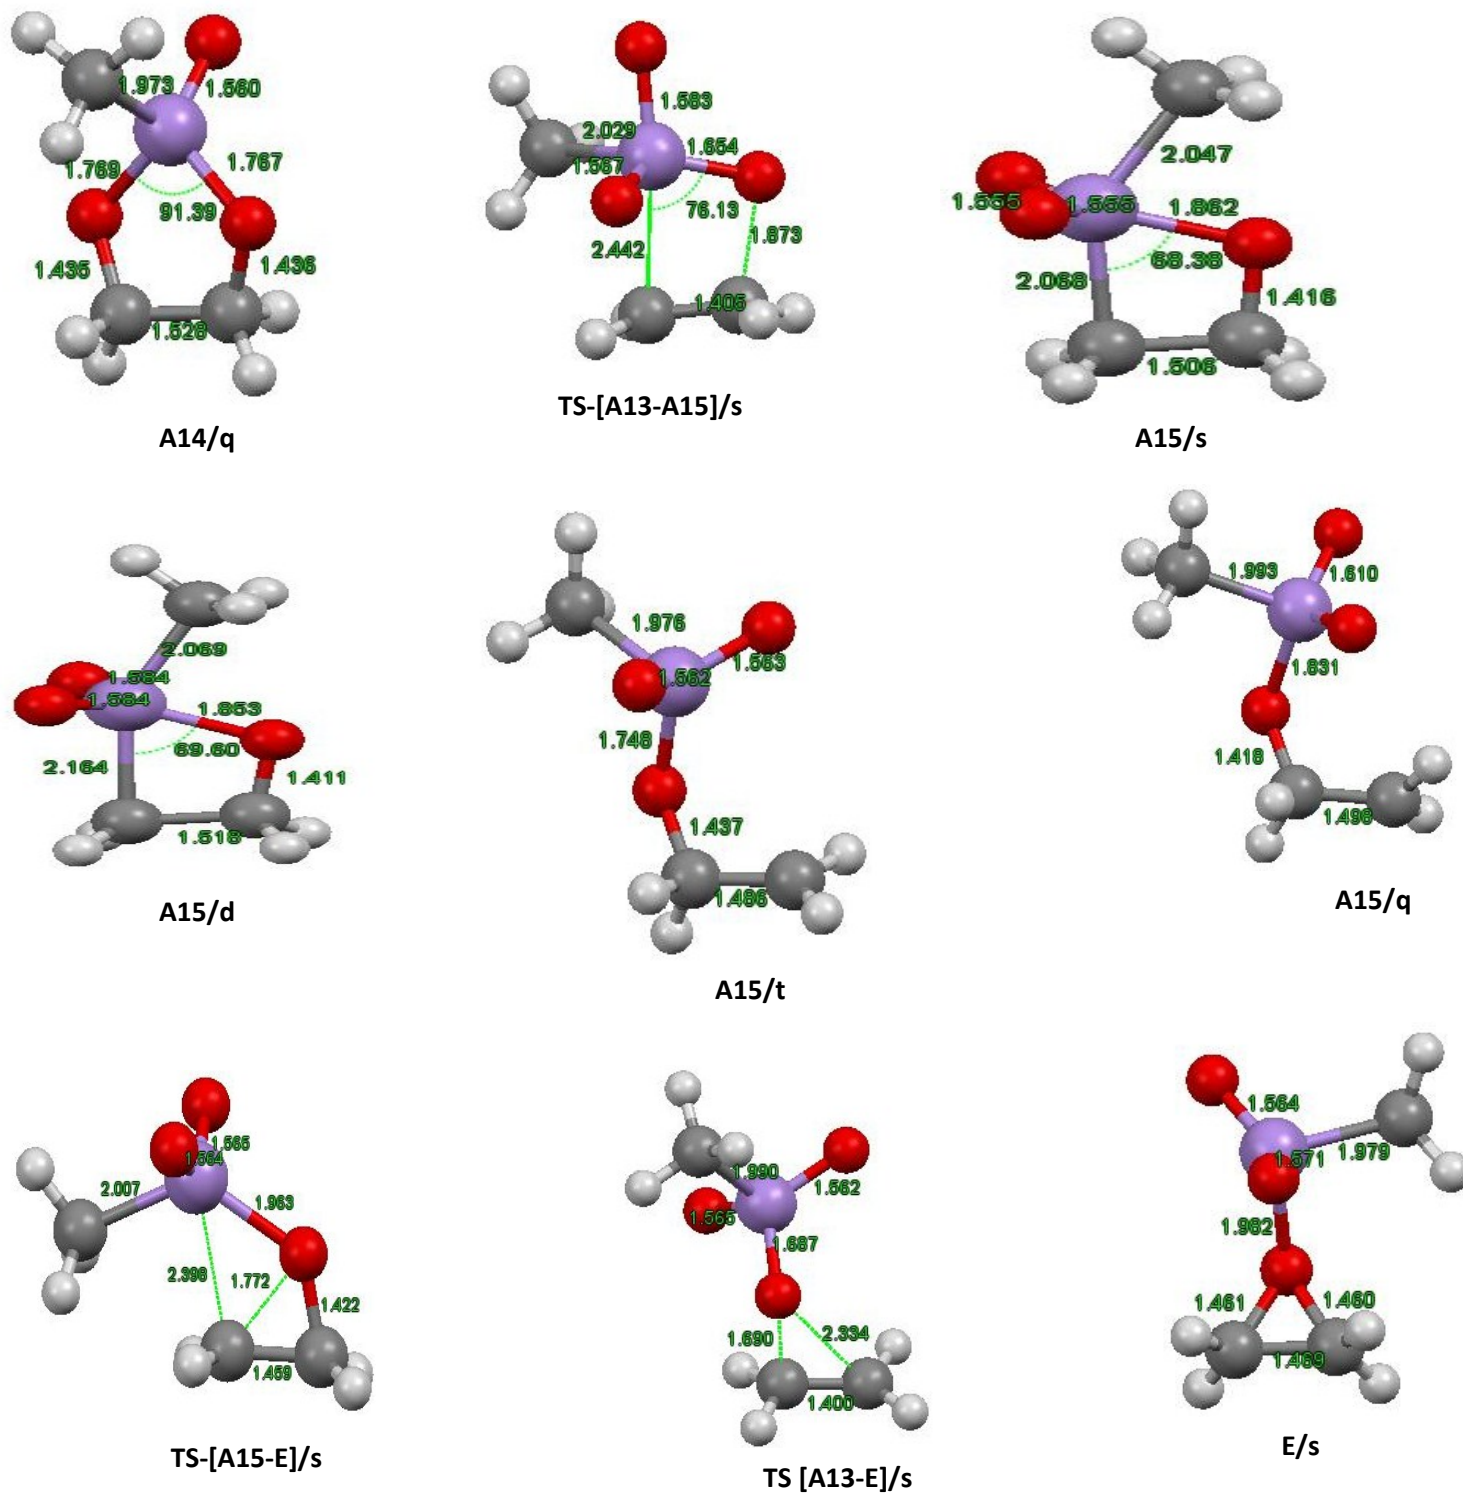

**Fig S4:** Optimized geometrical parameters of the reaction of  $\text{MnO}_3(\text{CH}_3)$  with Ethylene. Bond distances and angles in Å and degrees.

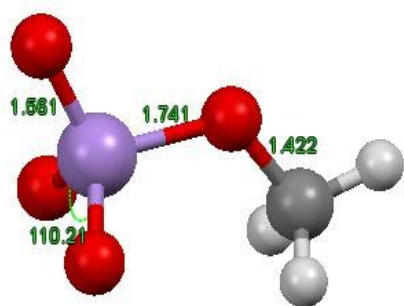

A16/s

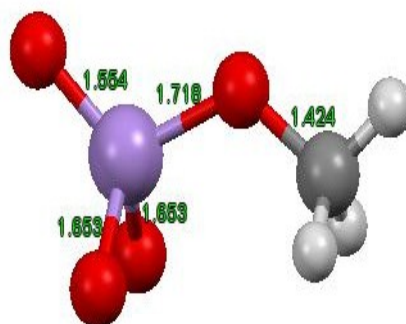

A16/d

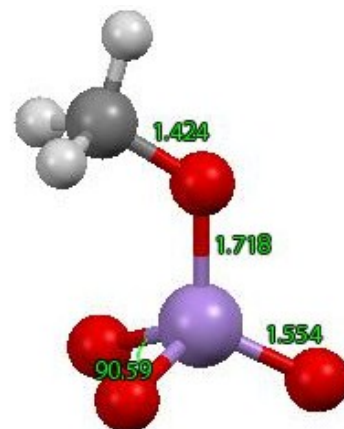

A16/t

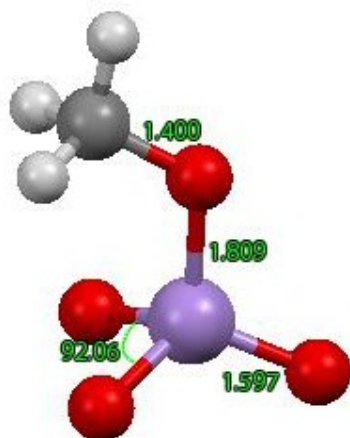

A16/q

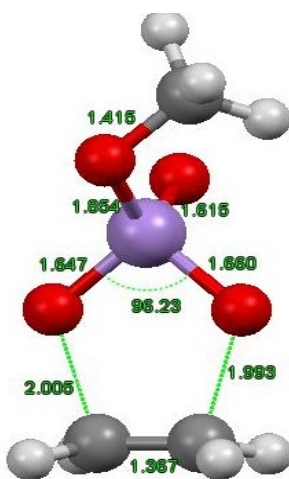

TS-[A16-A17]/s

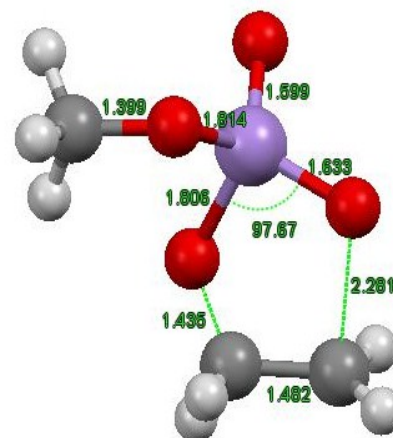

TS-[A16-X]/d

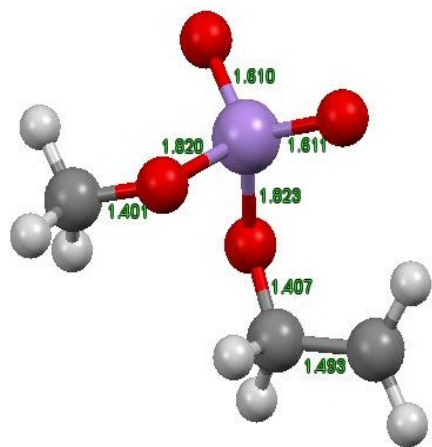

X/d

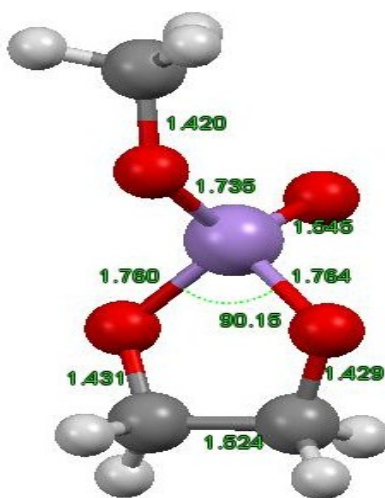

A17/s

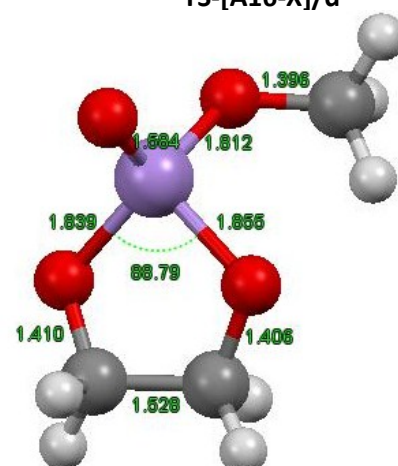

A17/t

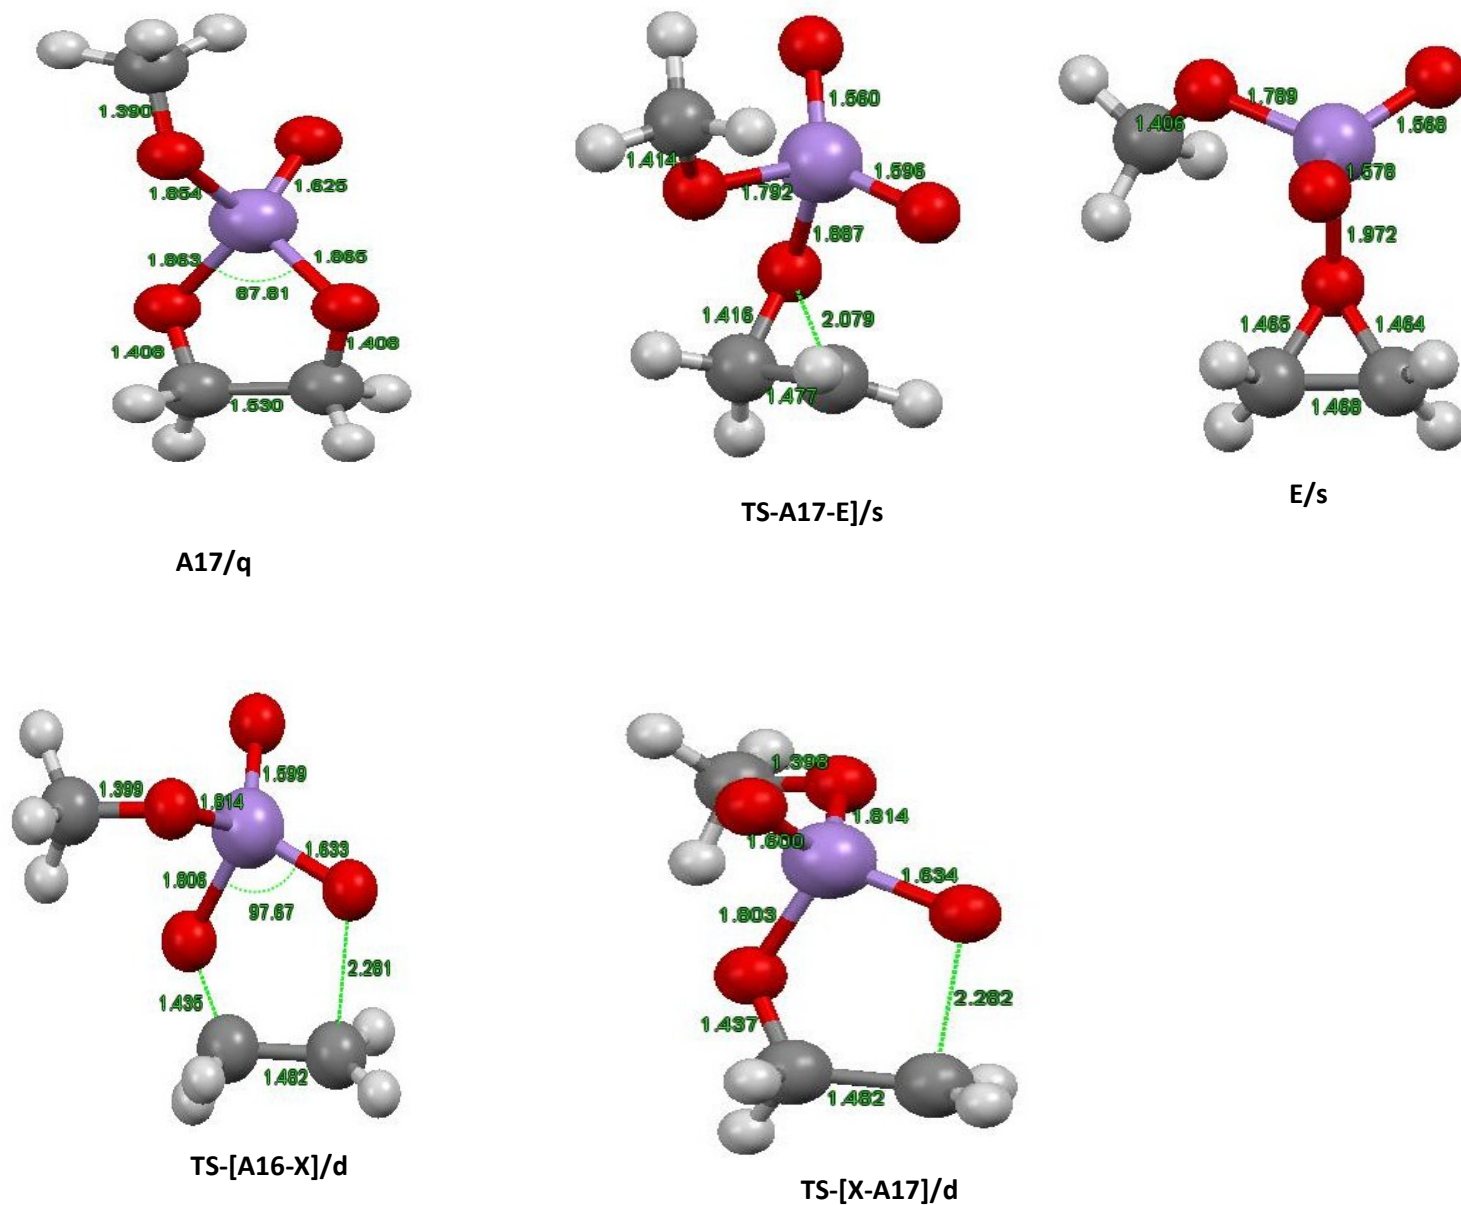

**Fig S5:** Optimized geometrical parameters of the reaction of  $\text{MnO}_3(\text{OCH}_3)$  with Ethylene. Bond distances and angles in Å and degree



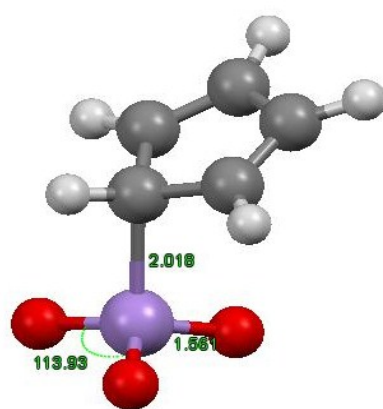

A18/s

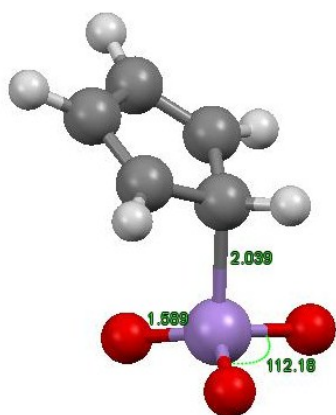

A18/d

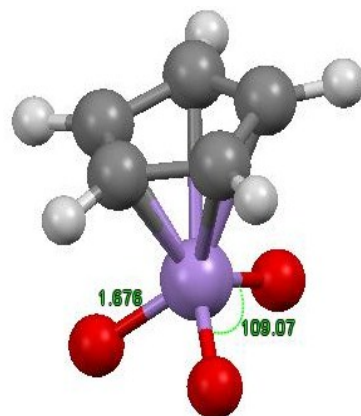

A18/t

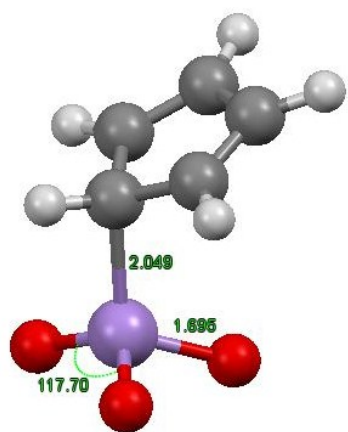

A18/q

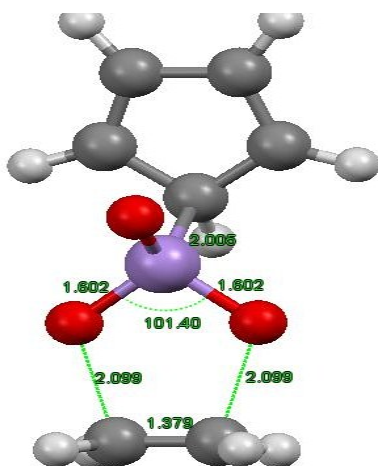

TS-[A18-A19]/s

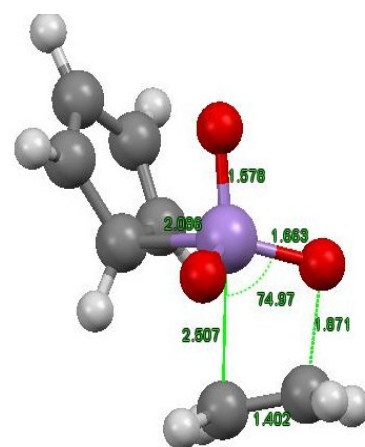

TS-[A18-A20]/s

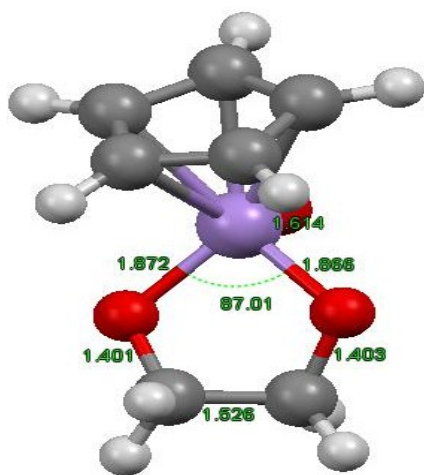

A19/s

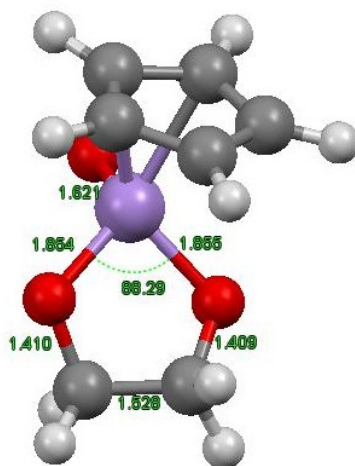

A19/d

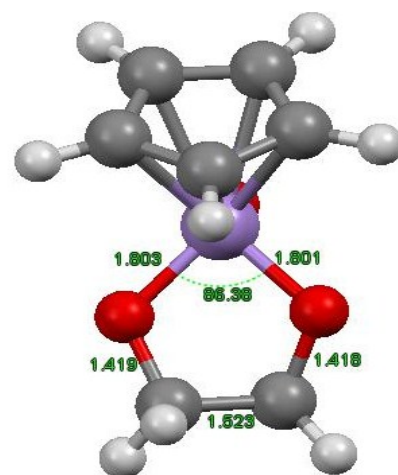

A19/q

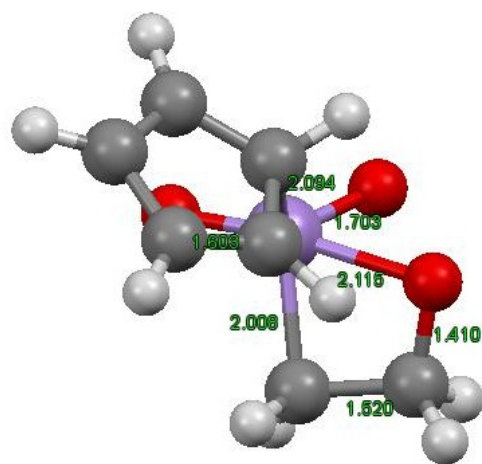

A20/s

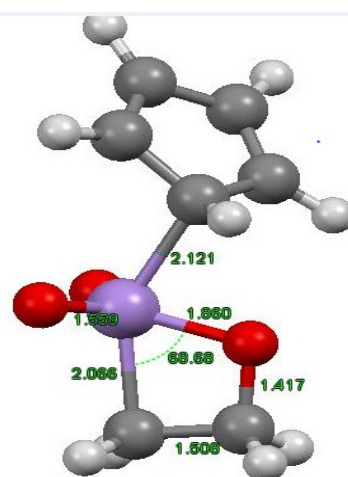

A20/q

**Fig S6:** Optimized geometrical parameters of the reaction of  $\text{MnO}_3(\text{Cp})$  with Ethylene. Bond distances and angles in Å and degrees.
